# Supplementary material for: Formation of arsenene p–n junctions via organic molecular adsorption
Source: Royal Society of Chemistry journal article supplement (doi:10.1039/c7tc01972f), 2017-01-01
Supplement: c7tc01972f1.pdf [file c7tc01972f1.pdf]

Supplementary Information

Formation of arsenene p-n junctions via organic molecular adsorption

N. Gao<sup>a,b</sup>, Y. F. Zhu<sup>a</sup>, Q. Jiang<sup>\*a</sup>

<sup>a</sup>*Key Laboratory of Automobile Materials (Jilin University), Ministry of Education,  
and School of Materials Science and Engineering, Jilin University, Changchun,  
130022, China*

<sup>b</sup>*College of Machinery and Vehicle Engineering, Changchun University, Changchun,  
130022, China*

---

\* Author to whom any correspondence should be addressed: Fax: +86 431 85095876; E-mail: [jiangq@jlu.edu.cn](mailto:jiangq@jlu.edu.cn)

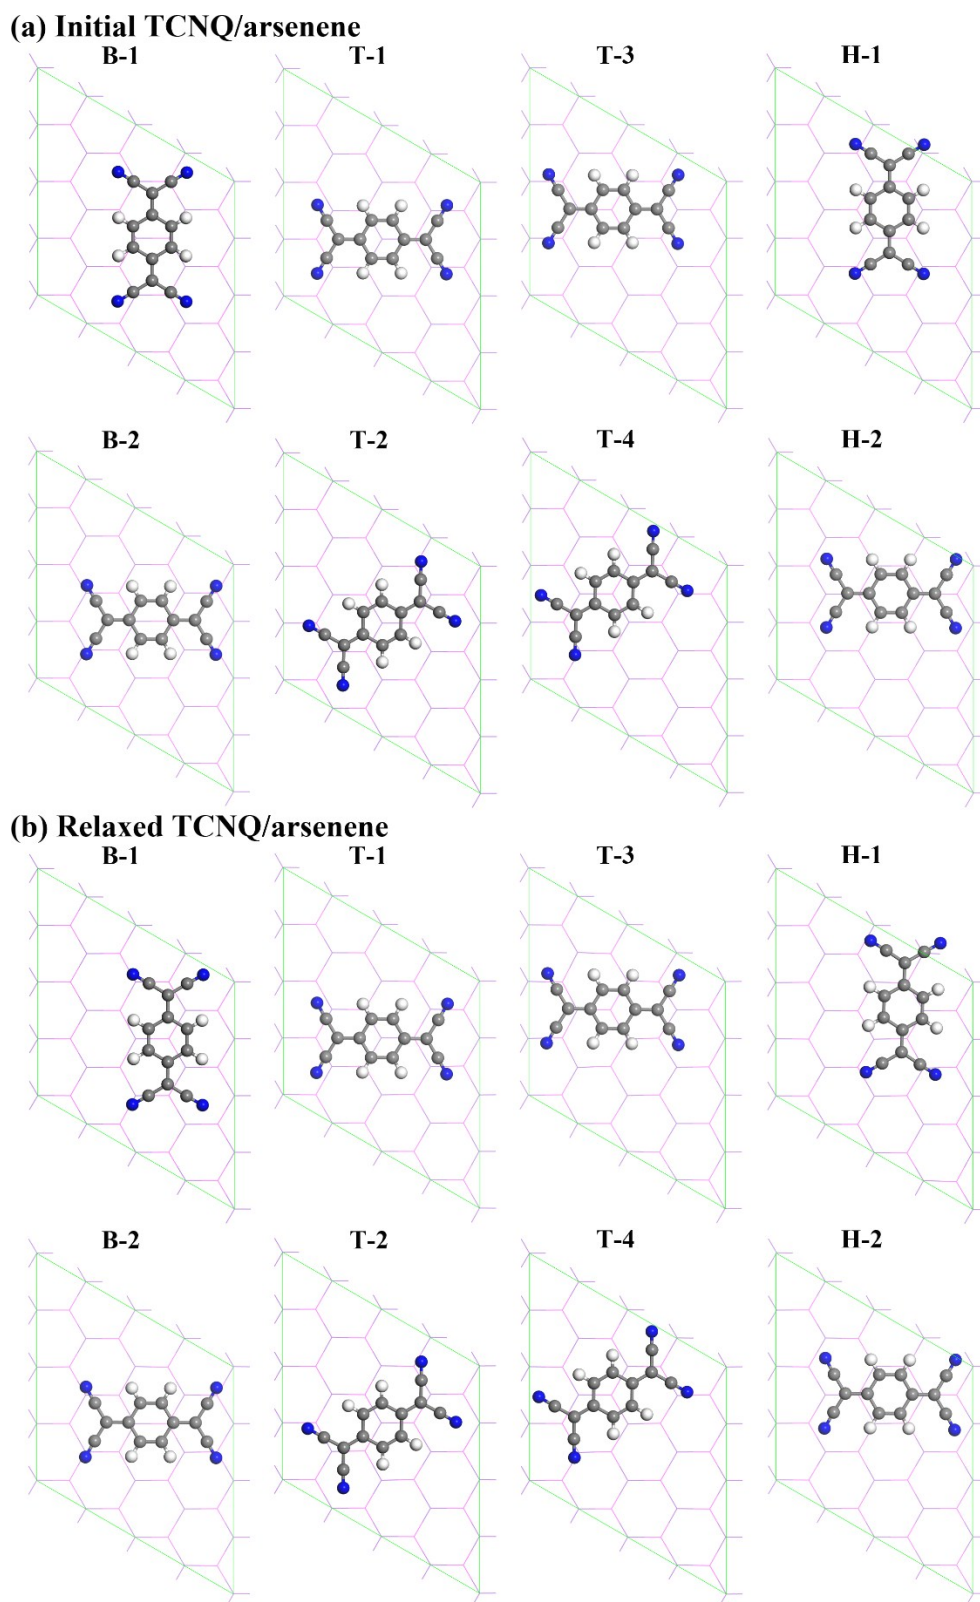

Fig. S1 Top views of the (a) initial possible configurations and (b) relaxed configurations for TCNQ/arsenene. The different sublattices of As atoms in arsenene are colored differently. N, C and H atoms are colored by blue, grey and white, respectively.

**(a) Initial TTF/arsenene**

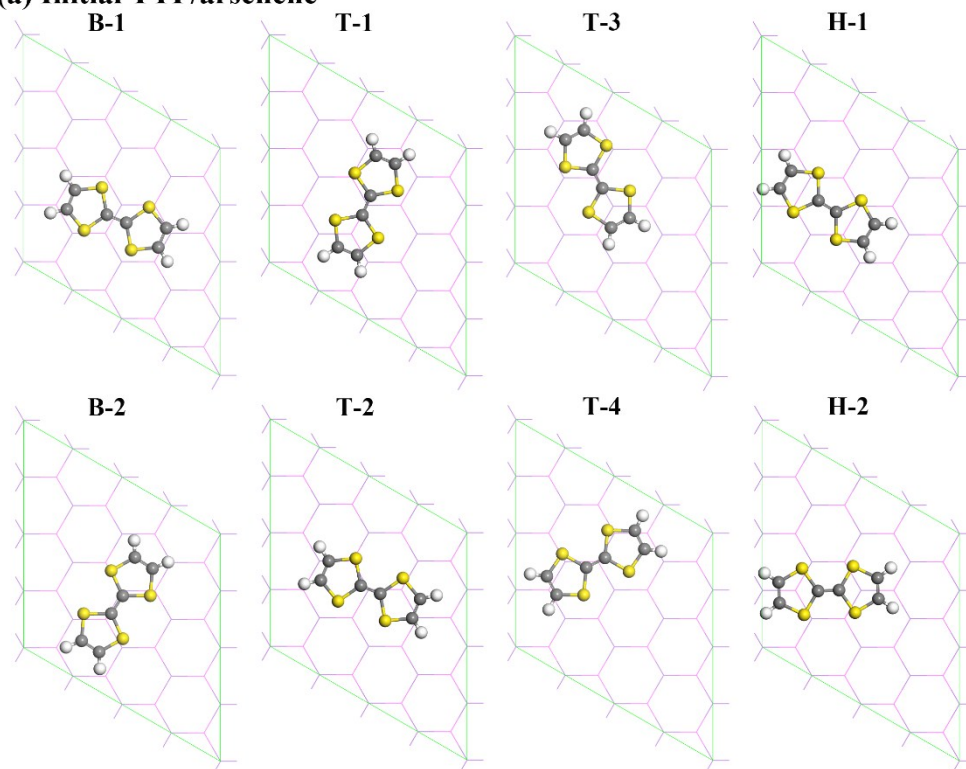

**(b) Relaxed TTF/arsenene**

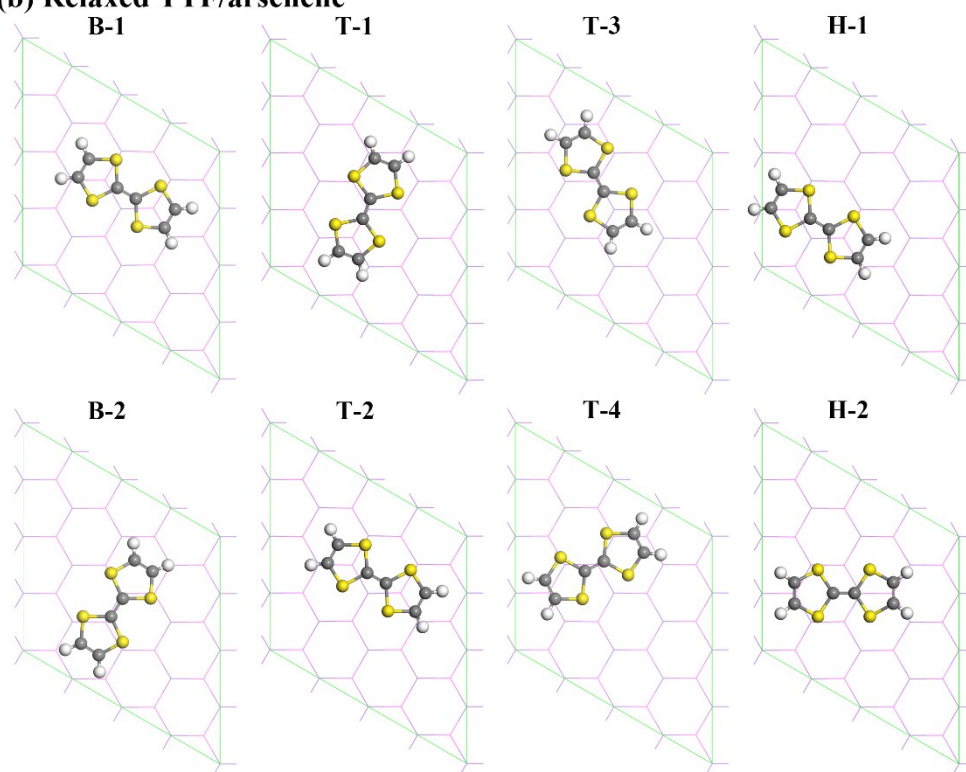

Fig. S2 Top views of the (a) initial possible configurations and (b) relaxed configurations for TTF/arsenene. The different sublattices of As atoms in arsenene are colored differently. S atoms are colored by yellow.

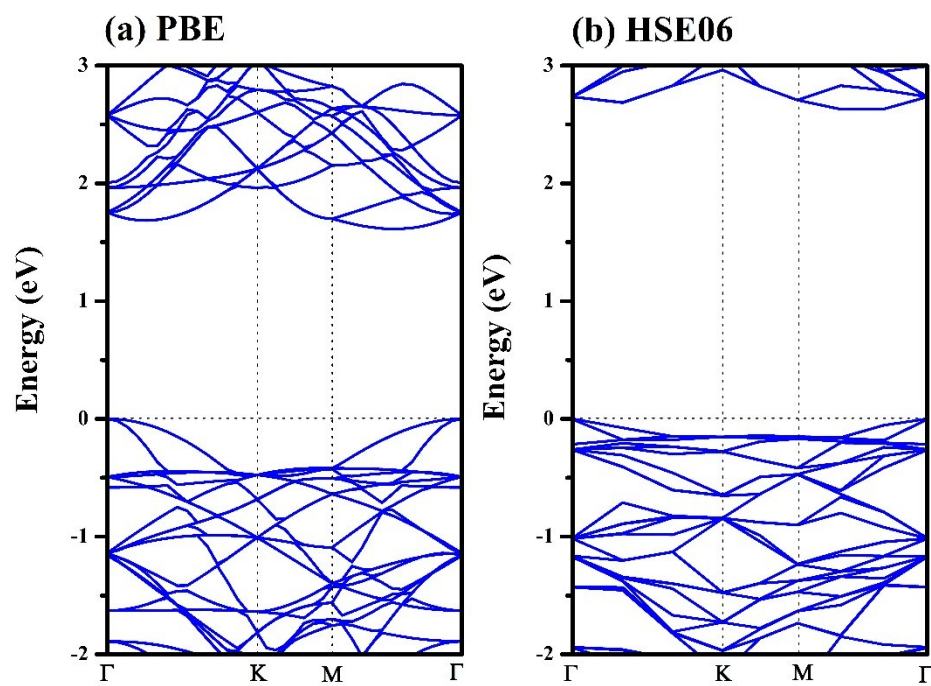

Fig. S3 Electronic band structures of arsenene monolayer calculated by (a) PBE and (b) HSE06 approaches.

Table S1: Adsorption Energies ( $E_{\text{ad}}$ ), Distances between the centroid of molecule and the arsenene layer ( $d$ ), and band gaps ( $E_{\text{p}}$  or  $E_{\text{n}}$ ) of eight high symmetry adsorption configuration for TCNQ/arsenene and TTF/arsenene systems.

| adsorbate |                      | B-1   | B-2   | T-1   | T-2   | T-3   | T-4   | H-1   | H-2   |
|-----------|----------------------|-------|-------|-------|-------|-------|-------|-------|-------|
| TCNQ      | $E_{\text{ad}}$ (eV) | 1.433 | 1.372 | 1.337 | 1.369 | 1.345 | 1.431 | 1.391 | 1.360 |
|           | $d$ (Å)              | 3.357 | 3.365 | 3.430 | 3.436 | 3.409 | 3.362 | 3.426 | 3.382 |
|           | $E_{\text{p}}$ (eV)  | 0.376 | 0.374 | 0.376 | 0.361 | 0.353 | 0.373 | 0.374 | 0.389 |
| TTF       | $E_{\text{ad}}$ (eV) | 1.111 | 0.959 | 0.973 | 1.118 | 0.968 | 0.890 | 1.120 | 1.063 |
|           | $d$ (Å)              | 3.329 | 3.512 | 3.417 | 3.325 | 3.412 | 3.383 | 3.325 | 3.099 |
|           | $E_{\text{n}}$ (eV)  | 0.996 | 0.998 | 0.983 | 1.001 | 0.972 | 1.012 | 1.000 | 1.083 |
